# Supplementary material for: Re-Imaging the Future in Urban Studies and Built Environment Discourse: A Neurourbanism Perspective
Source: MDPI journal article supplement (doi:10.3390/buildings12122056), 2022-11-23
Supplement: s1 [file s1]

## SUPPLEMENTARY MATERIAL FOR NEUROURBANISM

Figure S1: title; Rural Vs. Urban population (1960-2017)

Figure S2: title; PRISMA approach

Figure S3: title; Visualization of the document co-citation network by institution/organization (Modularity  $Q=0.4761$ ; Average silhouette score = 0.8449 ( $Q, S=0.609$ ))

Figure S4: title; Visualization of the document co-citation network by country (Modularity  $Q=0.4761$ ; Average silhouette score = 0.8449 ( $Q, S=0.609$ ))

Table S1: title; Top 20 influencers/scholars on neurourbanism (by centrality)

Table S2: Cited countries and institutions

Text S1: Citespace

Text S2: Descriptive analysis

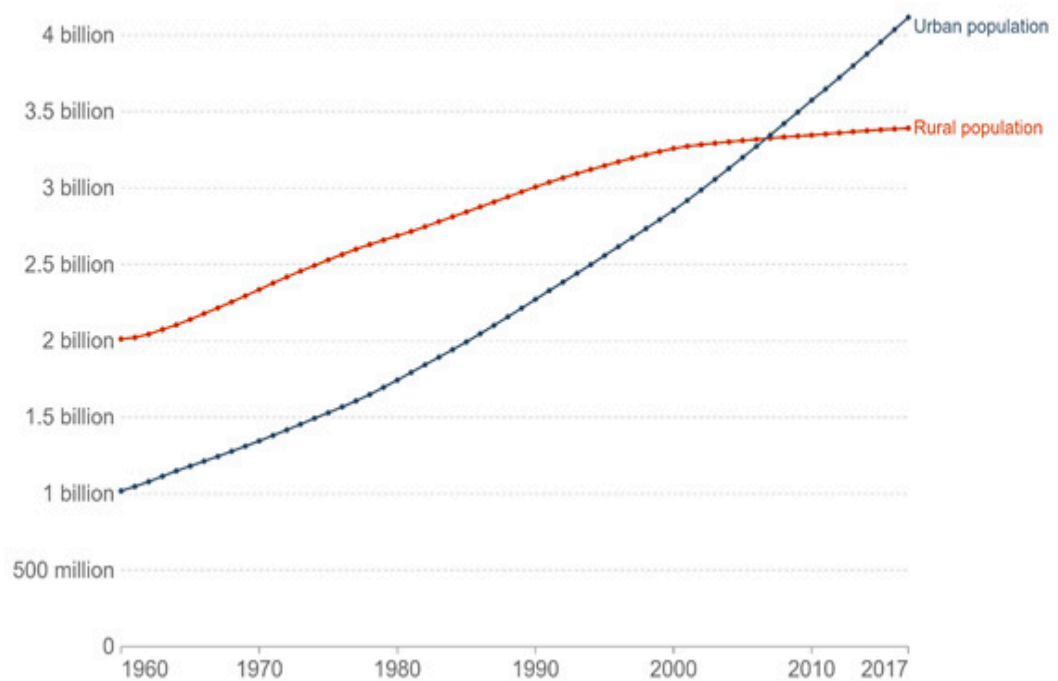

Figure S1: Rural Vs. Urban population (1960-2017)

Source: Ritchie and Roser (2019)

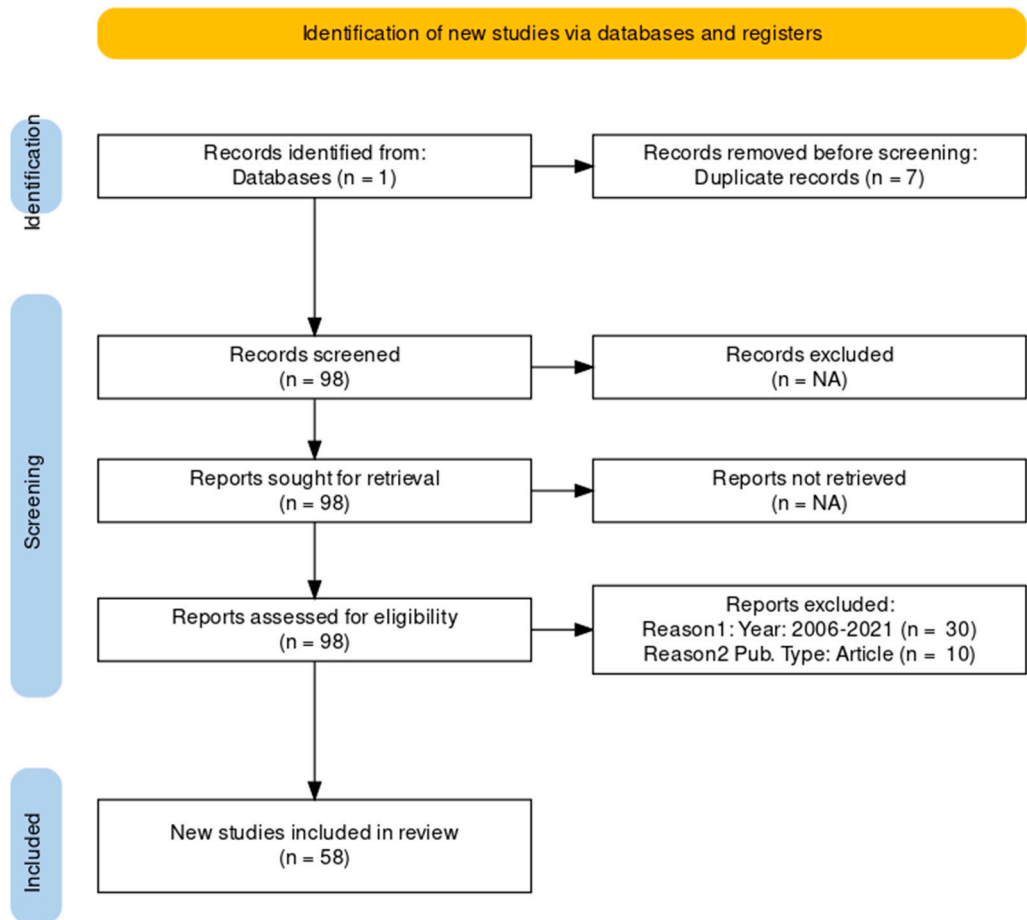

Figure S2: PRISMA approach

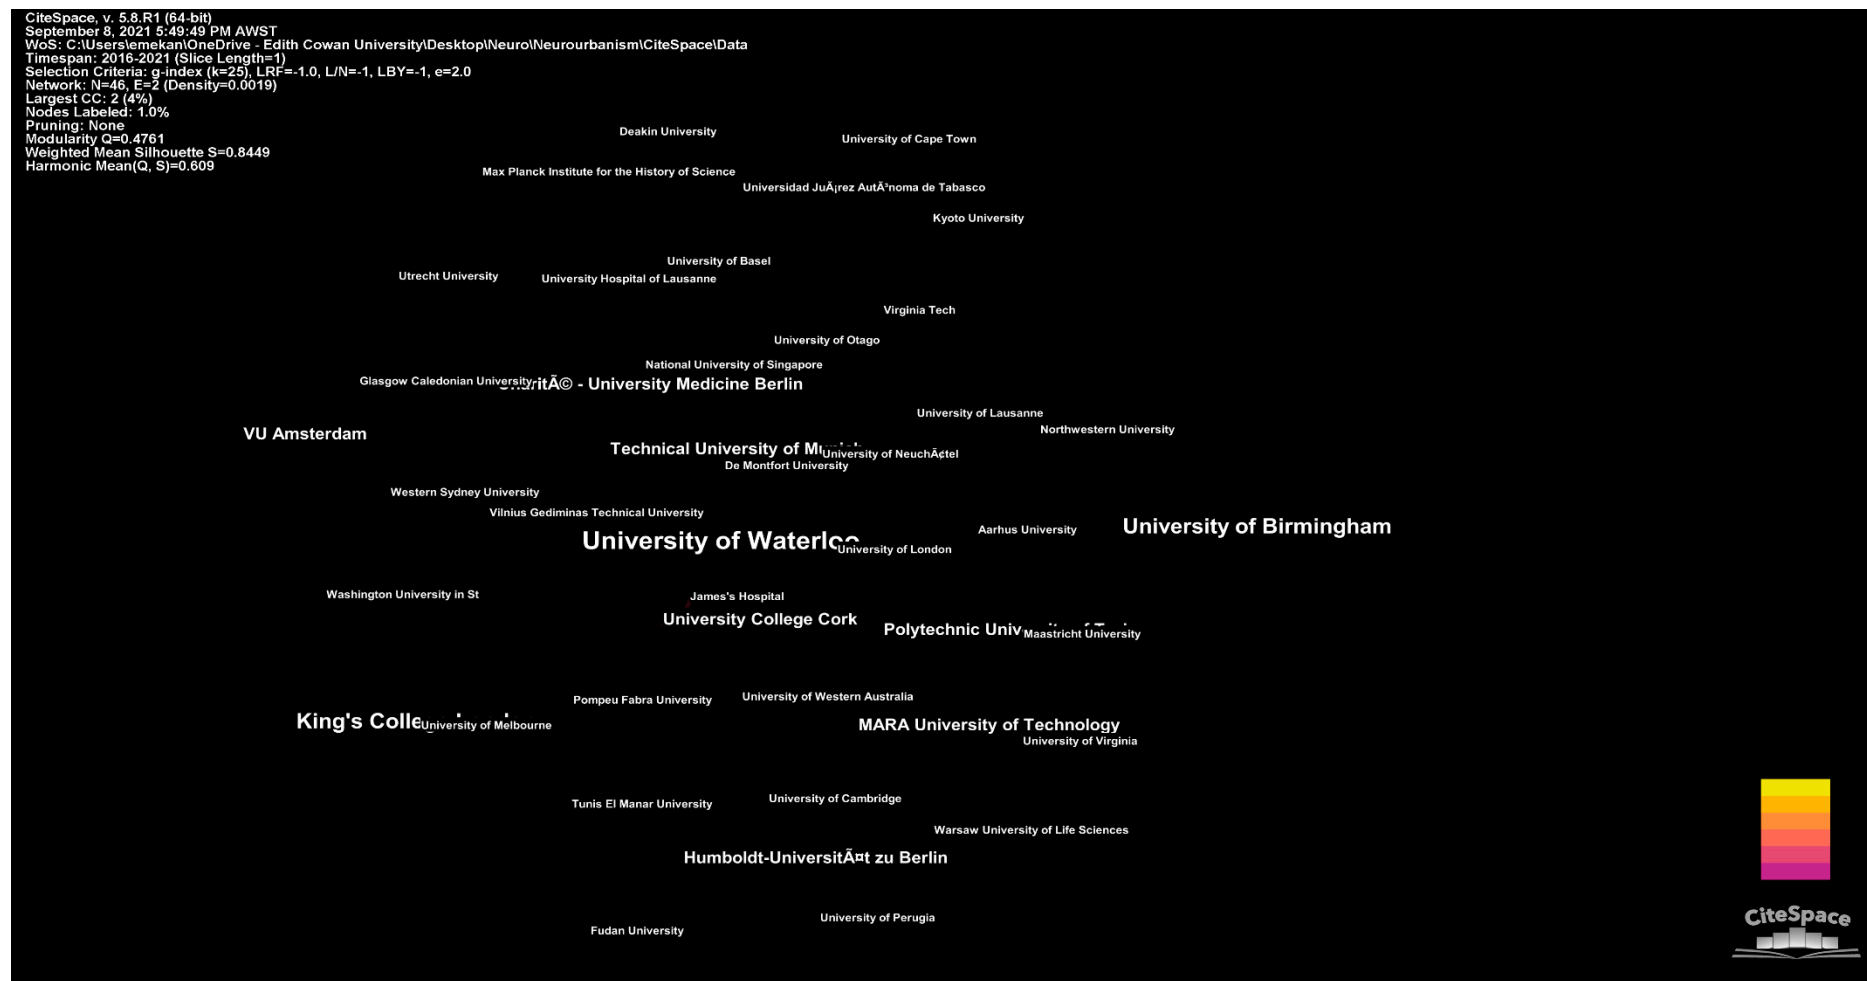

Figure S3: Visualization of the document co-citation network by institution/organization (Modularity Q=0.4761; Average silhouette score = 0.8449 (Q, S=0.609))

CiteSpace, v. 5.8.R1 (64-bit)  
 September 8, 2021 6:00:52 PM AWST  
 WOS: C:\Users\iemekan\OneDrive - Edith Cowan University\Desktop\Neuro\Neurourbanism\CiteSpace\Data  
 Timespan: 2016-2021 (Slice Length=1)  
 Selection Criteria: g-index (k=25), LRF=1.0, L/N=1, LBY=1, w=2.0  
 Network: N=28, E=2 (Density=0.0053)  
 Largest CC: 2 (7%)  
 Nodes Labeled: 1.0%  
 Pruning: None  
 Modularity Q=0.4761  
 Weighted Mean Silhouette S=0.8449  
 Harmonic Mean(Q, S)=0.609

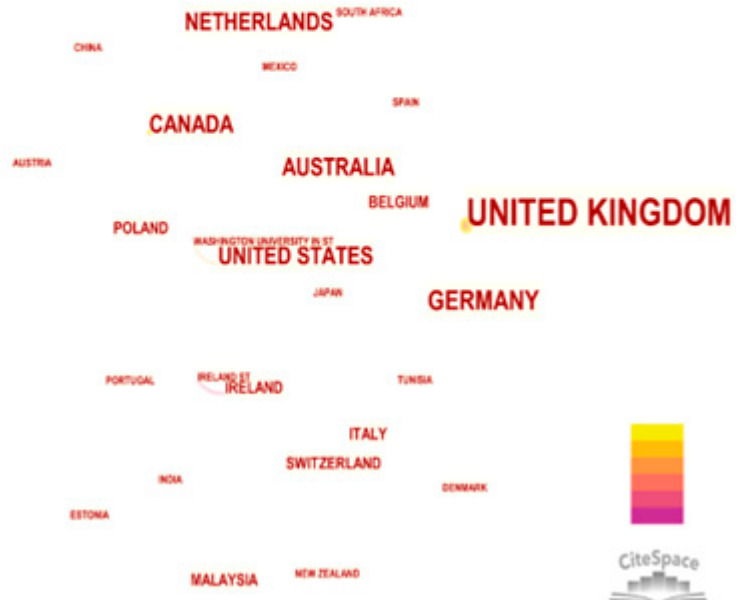

Figure S4: Visualization of the document co-citation network by country (Modularity Q=0.4761; Average silhouette score = 0.8449 (Q, S=0.609))

#### SUPPLEMENTARY DOCUMENT: Text S1: CiteSpace

After gathering the data, we utilized Citespace software package 5.8.R1 to analyze the generated results from PRISMA. Citespace is a software used to construct scholarly network connections between variables [44,45]. Citespace deals with homogeneity, preprecision, and connectivity of clusters [46], in constructing its conceptual and structural metrics. Chen, the developer of the software, argued that while the conceptual metrics are the visual illustration of the input [46], the structural metrics deal with the following: betweenness centrality, modularity Q, and silhouette score.

Betweenness centrality measures the degree of a node to another [47, 48]. As Golbeck explains, this measurement determines the flow of information throughout a network cluster[49]. The higher the centrality index, the chance of a stronger association. Blondel, Guillaume, Lambiotte, and Lefebvre argued that modularity Q gives credence to the measure of how relevant a cluster is in a network analysis or community structure [50]. The modularity Q test is insightful in identifying communities in networks since there are different properties, such as clustering coefficient, centrality, node degree, and betweenness [51], from an average node. For instance, a modularity Q of 0.7141 exhibits a high or lower than 5 may be too low [46]. The silhouette coefficient is a system of measurement for calculating the goodness of the clusters. The coefficient's value ranges between -1 and 1 [52], with 1 being the highest

and -1 the lowest [52]. Chen states that a figure of 0.3 is low and may not be significant but that 0.5 is homogenous in character [46].

Citespace maps the conceptual metrics of keywords based on themes by using two methods: LLR (Locally Linear Regression): Locally Linear Regression and TFIDF (Term Frequency Inverse Document Frequency): Term Frequency-Inverse Document Frequency. Newey demonstrates that LLR is a much more reliable statistical measurement tool compared to kernel regression[53]. LLR uses locally fitting lines rather than a constant and has a lesser tendency for bias, particularly when the model is linear. In statistical analysis, the LLR test is utilized for comparing good of fit between two statistical nodes. In this case, it compares the TFIDF, mutual information (MI), and cluster labels (USR) to generate the LLR. According to Shi and Liu, LLR can be used to estimate the p-value or, in comparison to a critical value, to either accept or reject the null hypothesis[54]. According to Havrlant and Kreinovich, tf-idf is a commonly used method for keyword detection[55].

Betweenness centrality measures the degree of a node to another [47,48]. As Golbeck explains it, this measurement determines the flow of information throughout a network cluster[49]. The higher the centrality index, the chance of a stronger association. Blondel, Guillaume, Lambiotte, and Lefebvre argued that modularity Q gives credence to the measure of how relevant a cluster is in a network analysis or community structure[50]. Modularity Betweenness centrality measures the degree of a node to another [47,48]. As Golbeck explains, this measurement determines the flow of information throughout a network cluster [49]. The higher the centrality index, the chance of a stronger association. Blondel, Guillaume, Lambiotte, and Lefebvre argued that modularity Q gives credence to the measure of how relevant a cluster is in a network analysis or community structure[50]. The modularity Q test is insightful in identifying communities in networks since there are different properties, such as clustering coefficient, centrality, node degree, and betweenness from an average node. For instance, a modularity Q of 0.7141 exhibits a high or lower than 5 may be too low[46,51]. The silhouette coefficient is a system of measurement for calculating the goodness of the clusters. The coefficient's value ranges between -1 and -1 [52], with 1 being the highest and -1 the lowest [52]. Chen states that a figure of 0.3 is low and may not be significant but that 0.5 is homogenous in character[46].

Q test is insightful in identifying communities in networks since there are different properties, such as clustering coefficient, centrality, node degree, and betweenness from an average node. For instance, modularity Q of 0.7141 exhibit a high or lower than 5 may be too low [46,51]. The silhouette coefficient is a system of measurement for calculating the goodness of the clusters. The coefficient's value ranges between -1 and -1, with 1 being the highest and -1 the lowest [52]. Chen states that a figure of 0.3 is low and may not be significant but that 0.5 is homogenous in character[46].

## **SUPPLEMENTARY DOCUMENT: Test S2: Descriptive analysis**

Text S2 provides the descriptive results following the DCA network publication by authors and the Top 20 influencers/scholars on neurourbanism (Table S1). In the section that follows, the study discusses document co-citation network publication timelines and spotlight by citation.

Table S1: Top 20 influencers/scholars on neurourbanism (by centrality)

| Count | Centrality  | Year | Cited reference                                                                                                                    |      |
|-------|-------------|------|------------------------------------------------------------------------------------------------------------------------------------|------|
| 28    | <b>0.65</b> | 2017 | Adli M, 2017, <i>The Lancet Psychiatry</i> , V4, P183, DOI 10.1016/s2215-0366(16)30371-6                                           | [2]  |
| 21    | <b>0.45</b> | 2019 | Fett AJ, 2019, <i>Current Opinion in Psychiatry</i> , V32, P232, DOI 10.1097/ycp.0000000000000486                                  | [5]  |
| 10    | <b>0.14</b> | 2009 | Peen J, 2009, <i>Acta Psychiatrica Scandinavica</i> , V121, P84, DOI 10.1111/j.1600-0447.2009.01438.x                              | [56] |
| 10    | <b>0.12</b> | 2012 | Vassos E, 2012, <i>Schizophrenia Bulletin</i> , V38, P1118, DOI 10.1093/schbul/sbs096                                              | [57] |
| 17    | <b>0.09</b> | 2011 | Lederbogen F, 2011, <i>Nature</i> , V474, P498, DOI 10.1038/nature10190                                                            | [58] |
| 6     | <b>0.05</b> | 2013 | Aspinall P, 2013, <i>British Journal of Sports Medicine</i> , V49, P272, DOI 10.1136/bjsports-2012-091877                          | [59] |
| 13    | <b>0.04</b> | 2010 | van Os J, 2010, <i>Nature</i> , V468, P203, DOI 10.1038/nature09563                                                                | [60] |
| 8     | <b>0.04</b> | 2014 | Haddad L, 2014, <i>Schizophrenia Bulletin</i> , V41, P115, DOI 10.1093/schbul/sbu072                                               | [61] |
| 2     | <b>0.04</b> | 2014 | Gravenhorst F, 2014, <i>Personal and Ubiquitous Computing</i> , V19, P335, DOI 10.1007/s00779-014-0829-5                           | [62] |
| 7     | <b>0.03</b> | 2001 | Pedersen CB, 2001, <i>JAMA Psychiatry</i> , V58, P1039, DOI 10.1001/archpsyc.58.11.1039                                            | [63] |
| 7     | <b>0.03</b> | 2017 | Frissen A, 2017, <i>Psychiatry Research Neuroimaging</i> , V271, P100, DOI 10.1016/j.psychresns.2017.11.004                        | [64] |
| 6     | <b>0.03</b> | 2015 | Gascon M, 2015, <i>International Journal of Environmental Research and Public Health</i> , V12, P4354, DOI 10.3390/ijerph120404354 | [65] |
| 5     | <b>0.03</b> | 2016 | Gong Y, 2016, <i>Environment International</i> , V96, P48, DOI 10.1016/j.envint.2016.08.019                                        | [66] |
| 10    | <b>0.02</b> | 2018 | DeVylder JE, 2018, <i>JAMA Psychiatry</i> , V75, P678, DOI 10.1001/jamapsychiatry.2018.0577                                        | [67] |
| 4     | <b>0.02</b> | 2012 | Abbott A, 2012, <i>Nature</i> , V490, P162, DOI 10.1038/490162a                                                                    | [68] |
| 7     | <b>0.01</b> | 2016 | Söderström O, 2016, <i>Health &amp; Place</i> , V42, P104, DOI 10.1016/j.healthplace.2016.09.002                                   | [69] |
| 7     | <b>0.01</b> | 2017 | Gruebner O, 2017, <i>Deutsches Arzteblatt Online</i> , V114, P121, DOI 10.3238/arztebl.2017.0121                                   | [70] |
| 6     | <b>0.01</b> | 2017 | Söderström O, 2017, <i>Psychosis</i> , V9, P1, DOI 10.1080/17522439.2017.1344296                                                   | [71] |
| 5     | <b>0.01</b> | 2015 | Rapp MA, 2015, <i>World Psychiatry</i> , V14, P249, DOI 10.1002/wps.20221                                                          | [72] |
| 5     | <b>0.01</b> | 2018 | Manning N, 2018, <i>Social Theory &amp; Health</i> , V17, P1, DOI 10.1057/s41285-018-00085-7                                       | [73] |

Table S2: Cited countries and institutions

| <b>Cited countries</b> | <b>Count</b> | <b>Year</b> | <b>Institution/ Organisation</b>                                                                                                                                |
|------------------------|--------------|-------------|-----------------------------------------------------------------------------------------------------------------------------------------------------------------|
| <b>United Kingdom</b>  | 11           | 2017        | University of Birmingham<br>King's College London<br>University of London<br>De Montfort University<br>University of Cambridge<br>Glasgow Caledonian University |
| <b>Germany</b>         | 5            | 2017        | Technical University of Munich<br>Humboldt-Universität zu Berlin<br>Charité – Universitätsmedizin Berlin<br>Max Planck Institute for the History of Science     |
| <b>Canada</b>          | 4            | 2020        | University of Waterloo                                                                                                                                          |
| <b>United States</b>   | 4            | 2018        | Virginia Tech<br>NorthWestern University<br>University of Virginia<br>Washington University in St                                                               |
| <b>Australia</b>       | 4            | 2017        | University of Melbourne<br>Deakin University<br>University of Western Australia<br>Western Sydney University                                                    |
| <b>Netherlands</b>     | 4            | 2017        | VU Amsterdam<br>Maastricht University<br>Utrecht University                                                                                                     |
| <b>Belgium</b>         | 2            | 2020        |                                                                                                                                                                 |
| <b>Switzerland</b>     | 2            | 2020        | University of Neuchâtel<br>University of Basel                                                                                                                  |
| <b>Ireland</b>         | 2            | 2017        | University College Cork                                                                                                                                         |
| <b>Malaysia</b>        | 2            | 2020        | MARA University of Technology                                                                                                                                   |
| <b>Italy</b>           | 2            | 2020        | Polytechnic University of Turin<br>University of Perugia                                                                                                        |
| <b>Poland</b>          | 2            | 2021        | Warsaw University of Life Sciences                                                                                                                              |
| <b>Ireland</b>         | 1            | 2017        | James's Hospital                                                                                                                                                |
| <b>South Africa</b>    | 1            | 2021        | University of Cape Town                                                                                                                                         |
| <b>New Zealand</b>     | 1            | 2020        | University of Otago                                                                                                                                             |
| <b>Lithuania</b>       | 1            | 2021        | Vilnius Gediminas Technical University                                                                                                                          |
| <b>Austria</b>         | 1            | 2020        |                                                                                                                                                                 |
| <b>Japan</b>           | 1            | 2020        | Kyoto University                                                                                                                                                |
| <b>Spain</b>           | 1            | 2020        | Pompeu Fabra University                                                                                                                                         |
| <b>Portugal</b>        | 1            | 2018        |                                                                                                                                                                 |
| <b>China</b>           | 1            | 2018        | Fudan University                                                                                                                                                |
| <b>Estonia</b>         | 1            | 2021        |                                                                                                                                                                 |
| <b>Tunisia</b>         | 1            | 2021        | Tunis El Manar University                                                                                                                                       |

|                  |   |      |                                                           |
|------------------|---|------|-----------------------------------------------------------|
| <b>Denmark</b>   | 1 | 2019 | Aarhus University                                         |
| <b>Mexico</b>    | 1 | 2021 | Universidad Juárez Autónoma de Tabasco                    |
| <b>India</b>     | 1 | 2020 |                                                           |
| <b>France</b>    | 1 | 2020 | University of Lausanne<br>University Hospital of Lausanne |
| <b>Singapore</b> | 1 | 2018 | National University of Singapore                          |
