# Supplementary material for: Re-Imaging the Future in Urban Studies and Built Environment Discourse: A Neurourbanism Perspective
Source: MDPI journal article supplement (doi:10.3390/buildings12122056), 2022-11-23
Supplement: s1 [file s1]

Archive with 1 entries (1 files):
- buildings-1964634-supplementary.pdf
